# Supplementary material for: Corilagin increases the sensitivity of neuroblastoma to cisplatin by regulating the PI3K/AKT signaling pathway
Source: Research Square preprint supplement (doi:10.21203/rs.3.rs-8731803/v1), 2026-02-12

**Corilagin increases the chemotherapeutic sensitivity of neuroblastoma to cisplatin by regulating the PI3K/AKT signaling pathway**

**Supplementary Files**

**Table S1. List of utilized primers for qRT-PCR.**

| Gene | Gene ID | Forward primer  (5’-3’) | Reverse primer  (5’-3’) |
| --- | --- | --- | --- |
| *Beclin1* | 8678 | gaaccgcaagatagtggcagaa | agcagcattaatctcattccattcc |
| *Atg5* | 9474 | gaatatgaaggcacaccactgaa | aatcccatccagagttgcttgt |
| *Atg7* | 10533 | catgatgtcgtcttcctattgatgg | cggtctctggttgaatctcctg |
| *Sqstm1* | 8878 | atccgagtgtgaatttcctgaaga | cggtctctggttgaatctcctg |
| *Gapdh* | 2597 | ctggagaaacctgccaagtatg | ggtggaagaatgggagttgct |

**Fig. S1 Inhibitory effect of corilagin at different concentrations on NB transplanted tumor in nude mice.**

(A) Representative bioluminescent images of tumors in nude mice are shown. (B) The average signal intensity in the bioluminescent images of tumors was quantified (n=5). All experimental data are presented as the means ± SDs. Statistical significance: *P<0.05 and **P<0.01 compared with the 0 mg/kg group.


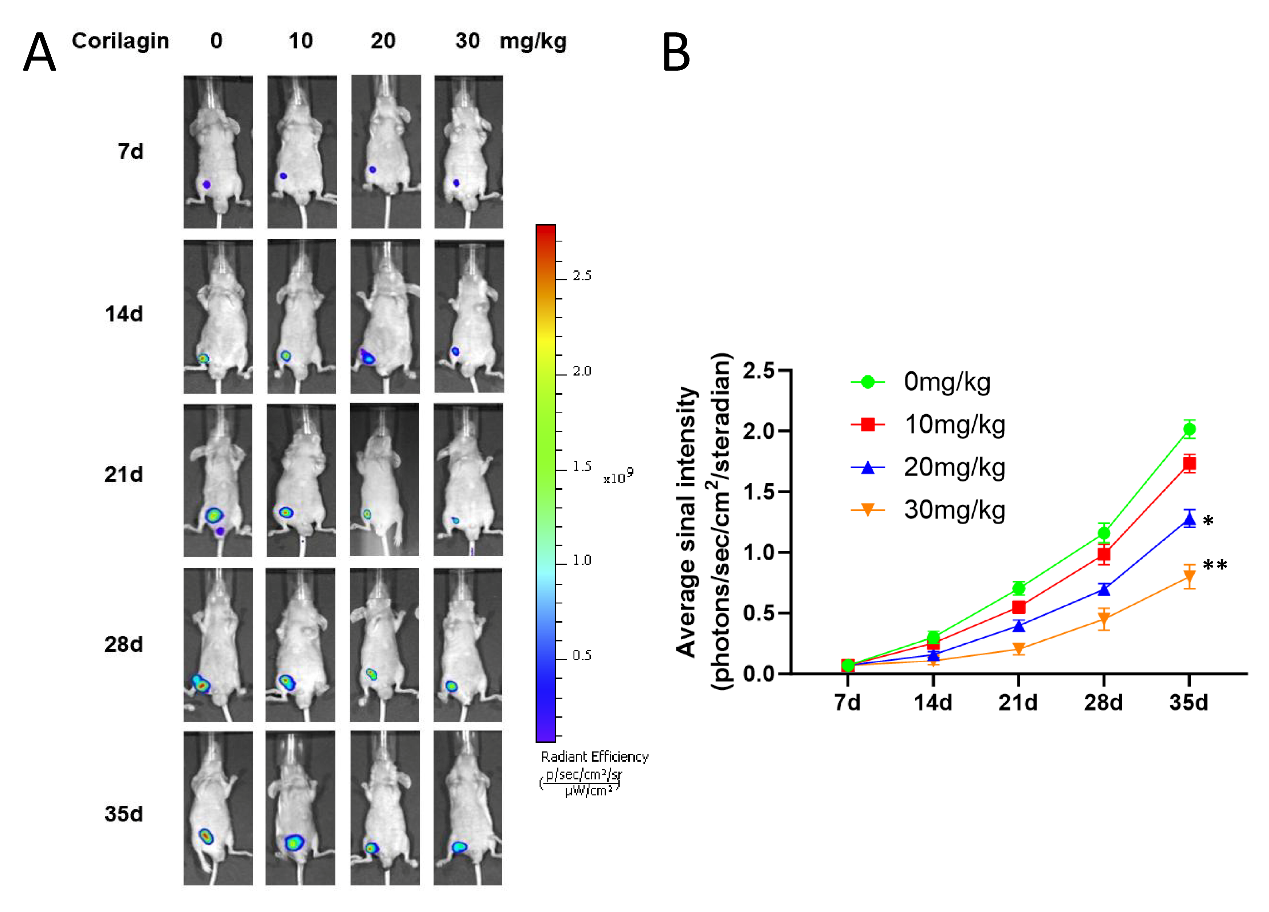


**Fig. S2. Corilagin exerts low toxicity in cisplatin-resistant NB treatment.**

(A) CD31 staining in SH‑SY5Y tumors after treatments. (B) Quantitative comparison of microvessel density in xenograft tumors. Statistical significance: *P<0.05 and **P<0.01 compared with the SH-SY5Y group; #P<0.05 and ##P<0.01 compared with the SH-SY5Y+Cis group. (C) HE staining of livers in nude mice after treatments. (D) CD31 staining in SH‑SY5Y tumors after treatments. (E) Quantitative comparison of microvessel density in xenograft tumors. Statistical significance: *P<0.05 and **P<0.01 compared with the SH-SY5Y group; #P<0.05 and ##P<0.01 compared with the SH-SY5Y+Cis group. (F) HE staining of livers in nude mice after treatments. (G) Representative images of neuroblastoma marker CD56 immunohistochemical staining in various groups of xenografted tumors and human neuroblastoma tissue. Scale bar: 50 µm. All experimental data are presented as the means ± SDs. The number of microvessel densities was counted in 5 random fields and analyzed.


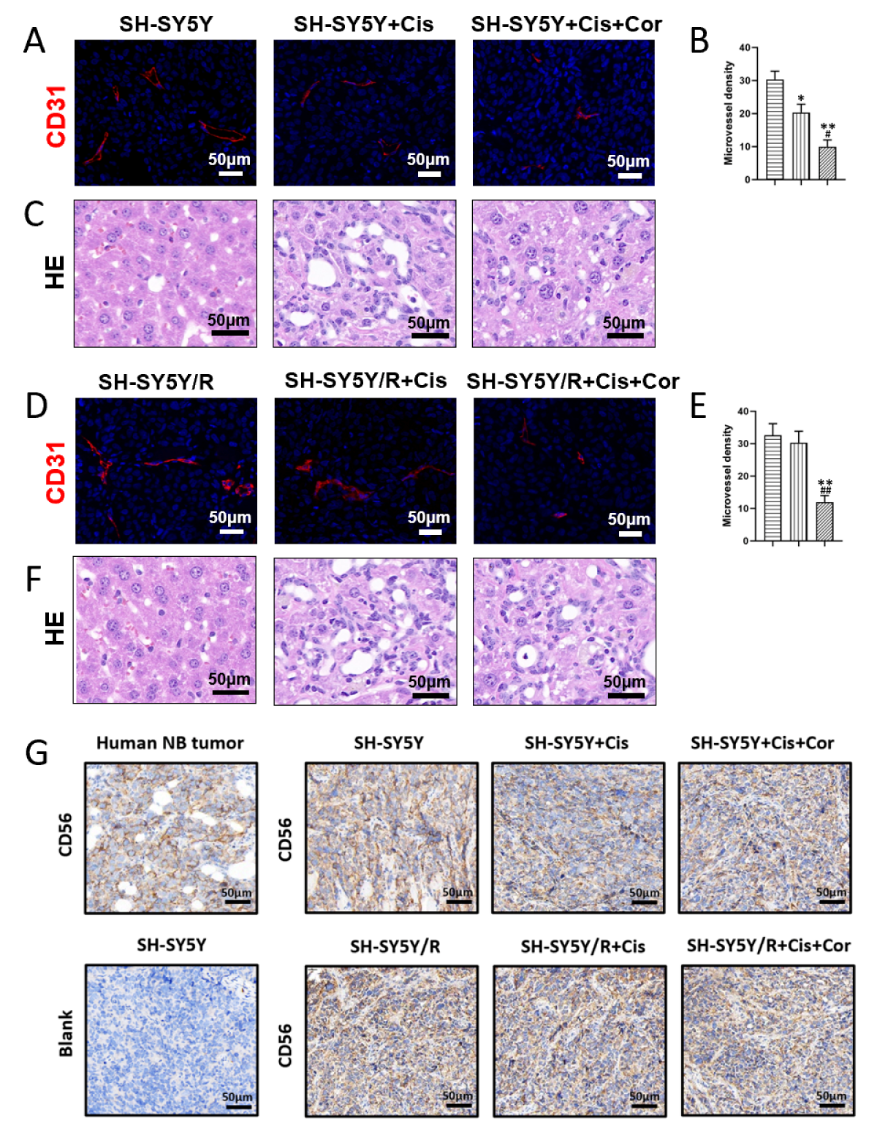


**Fig. S3. Drug resistance and corilagin caused differential expression of SH-5YSY/R and SH-5YSY/R.**

(A) Gene expression Heatmap of SH-5YSY and SH-5YSY/R cells detected by RNA sequencing (n=3). (B) Gene expression Heatmap of SH-5YSY/R and SH-5YSY/R +Cor cells detected by RNA sequencing (n=3). (C)Volcano plot of differentially expressed genes in the SH-5YSY and SH-5YSY/R cells (n=3). (D) Volcano plot of differentially expressed genes in the SH-5YSY/R and SH-5YSY/R +Cor cells (n=3).


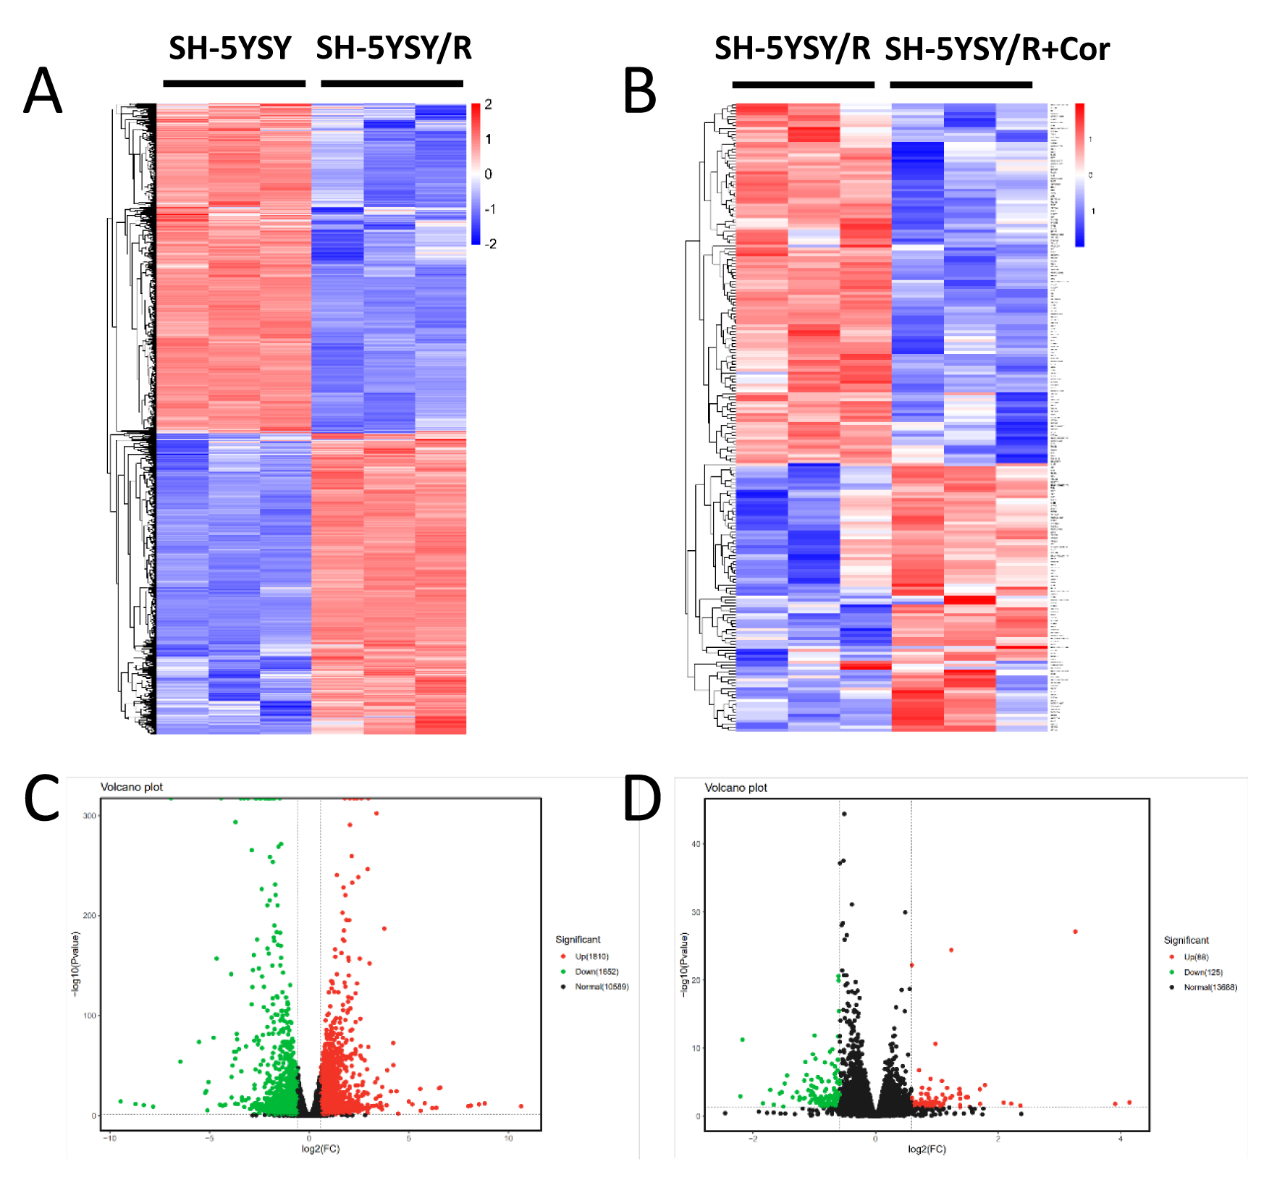


**Fig. S4. Corilagin inhibited the expression of autophagy-related genes in NB drug-resistant cell lines.**

The expression of autophagy-related genes *Beclin1*, *Atg5*, *Atg7* and *Sqstm1* in NB cells was detected by RT-qPCR (n=5). All experimental data are presented as the means ± SDs. Statistical significance: *P<0.05 and **P<0.01 compared with the SH-SY5Y+Cis group. Cor: corilagin; Cis: cisplatin.

**
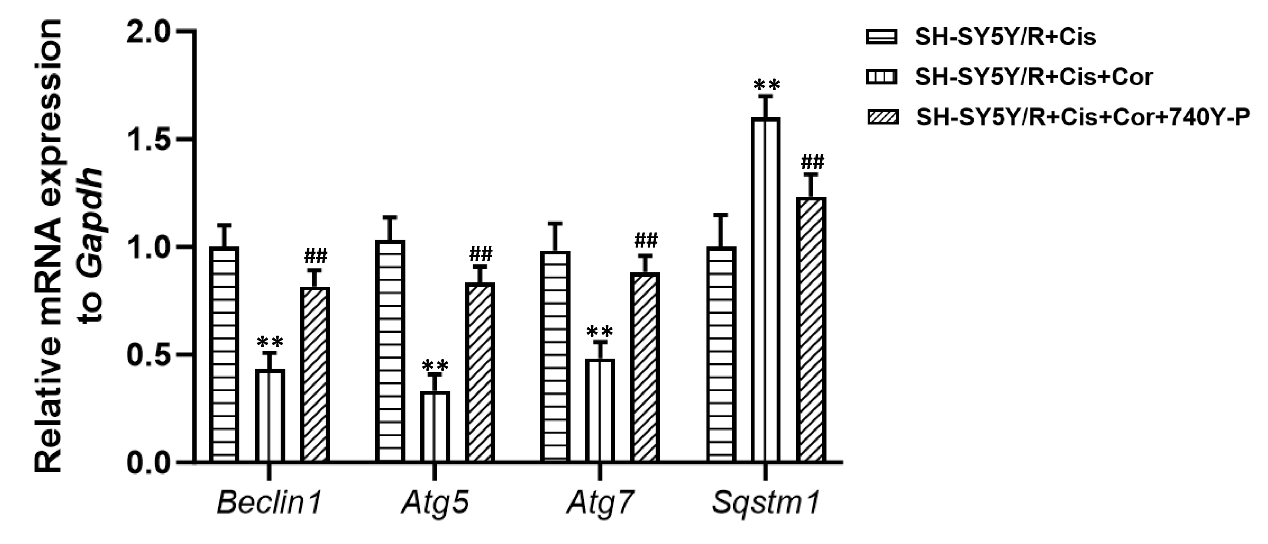
**

**Fig.S5. Original images of western blotting**


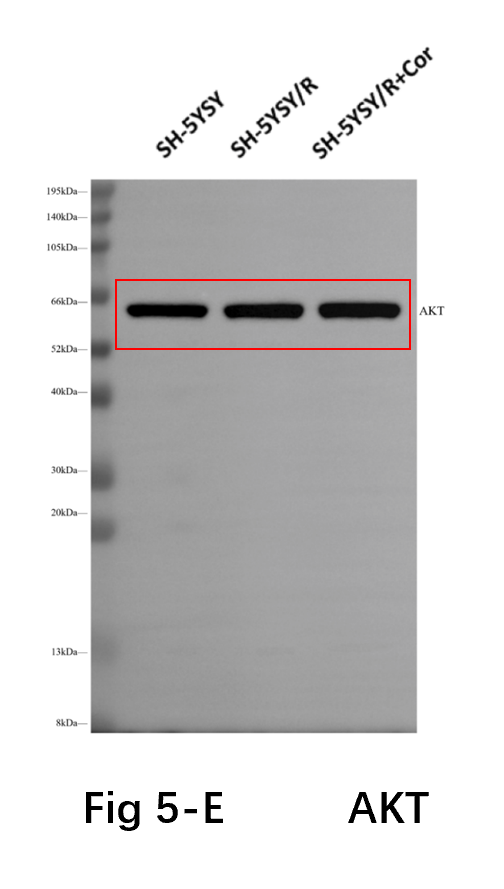




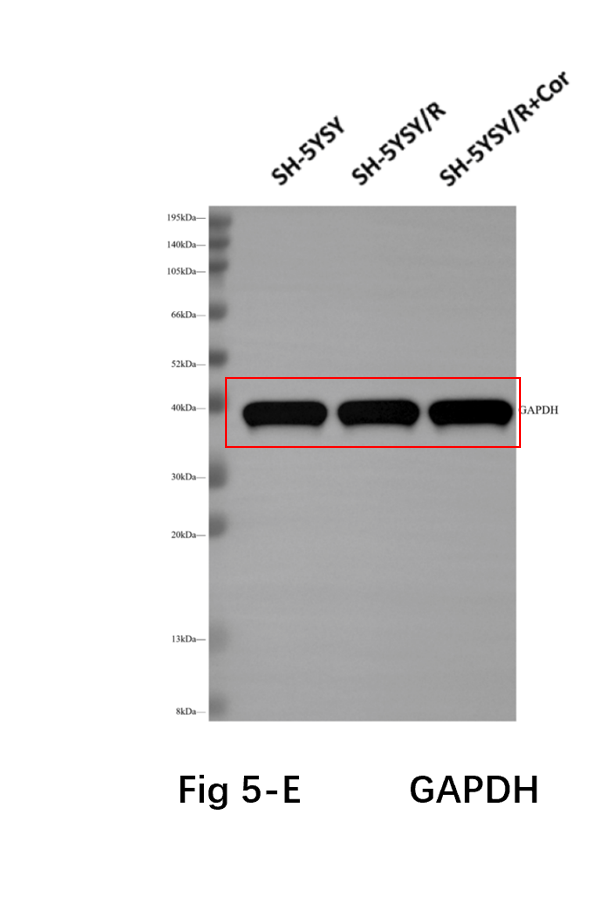




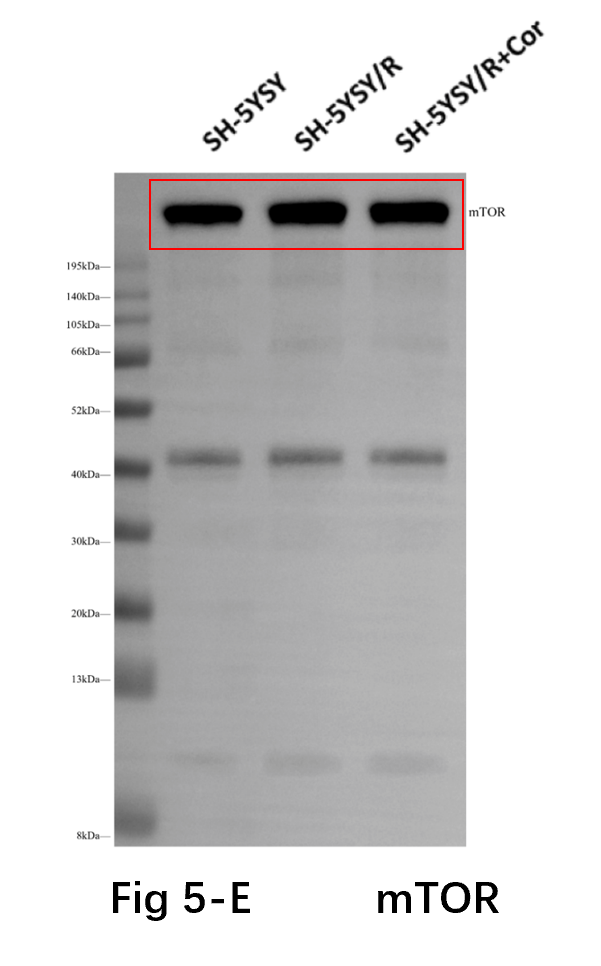




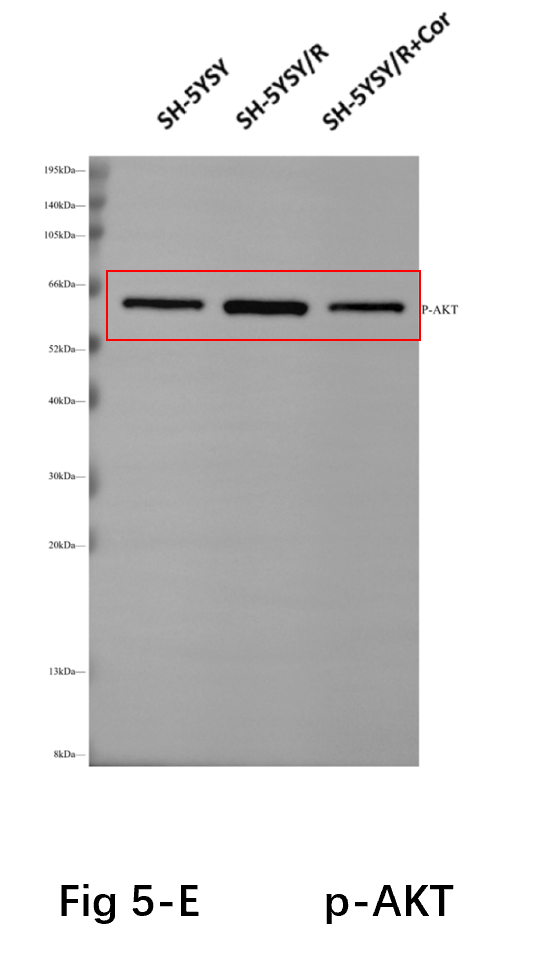




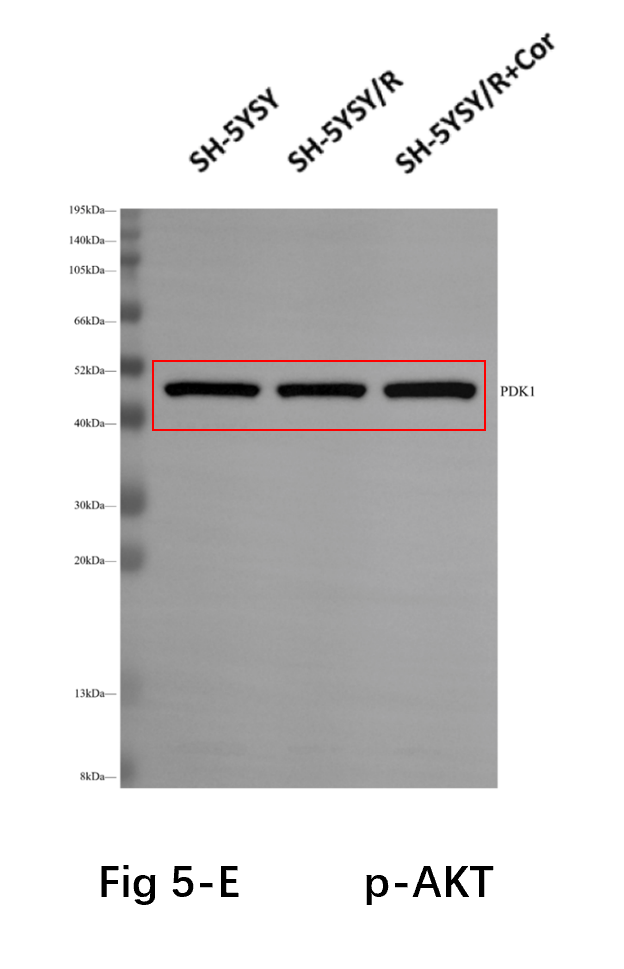





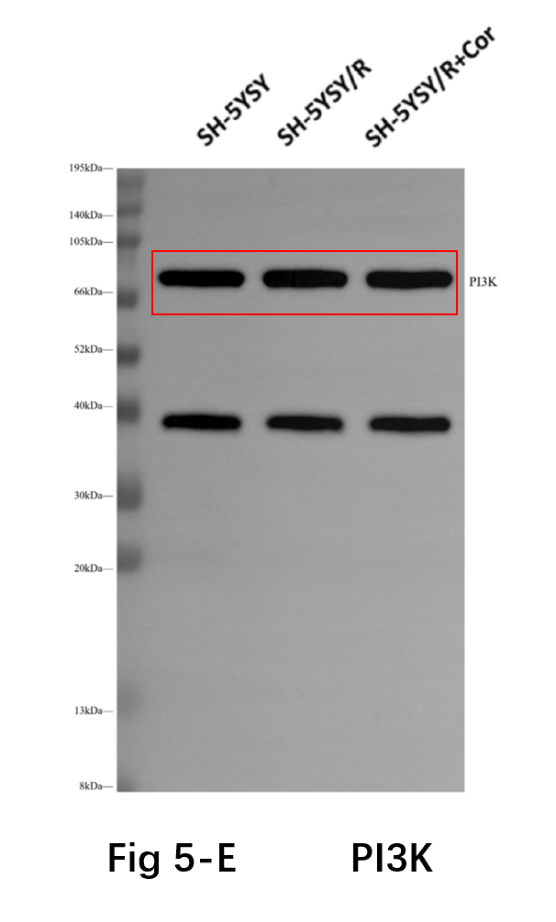




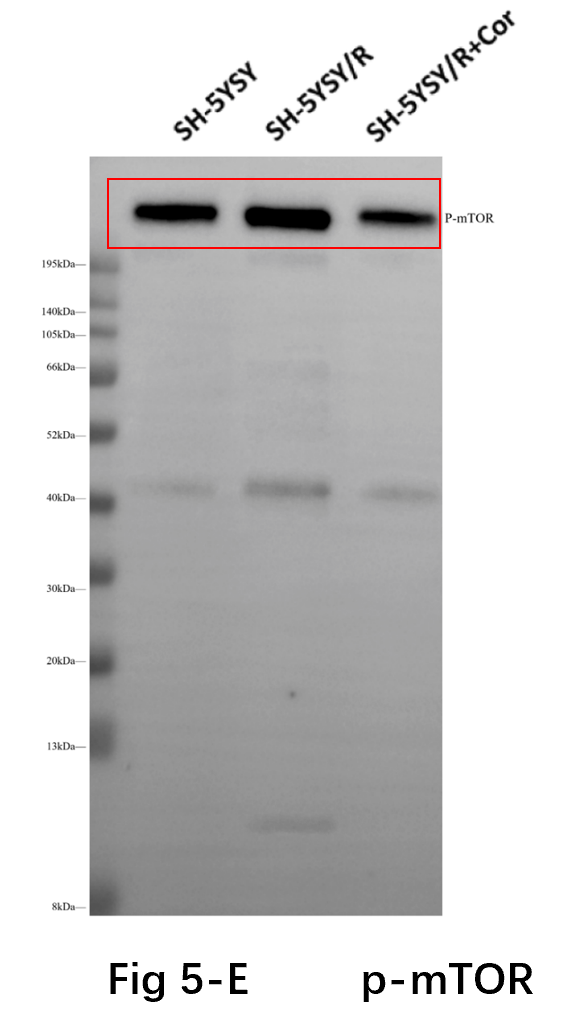




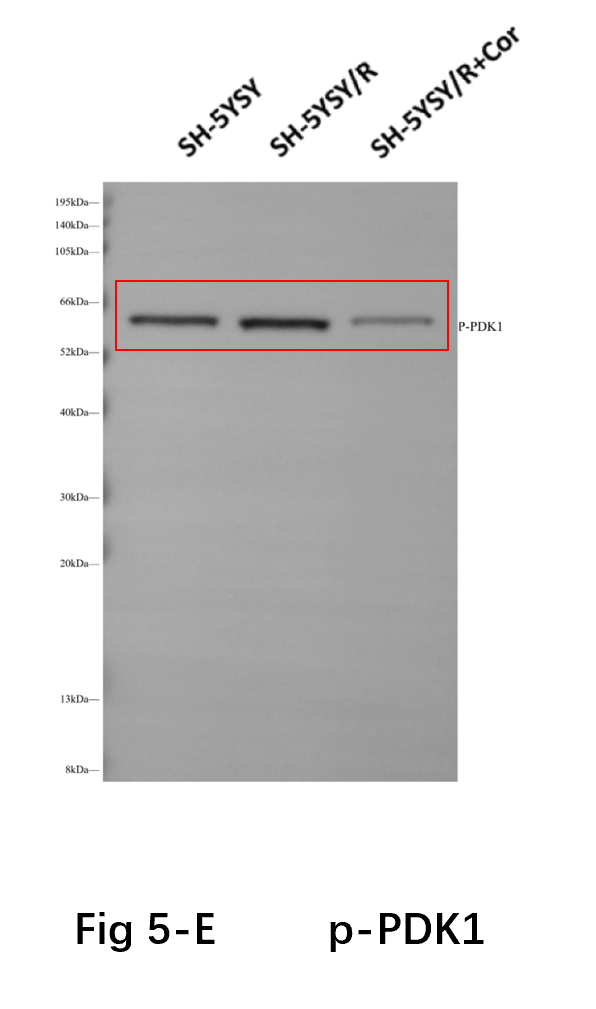




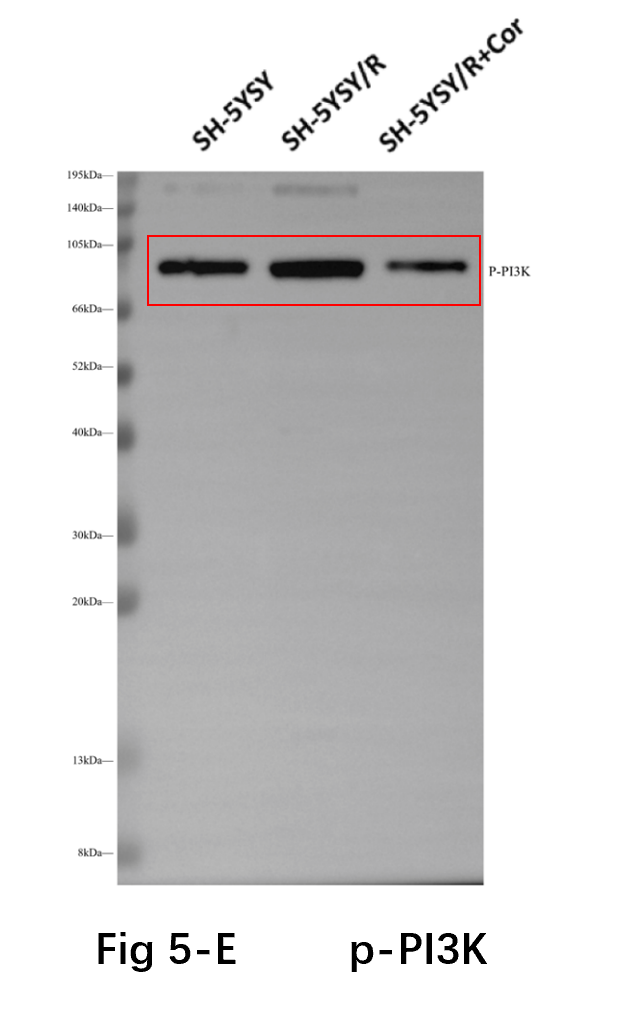





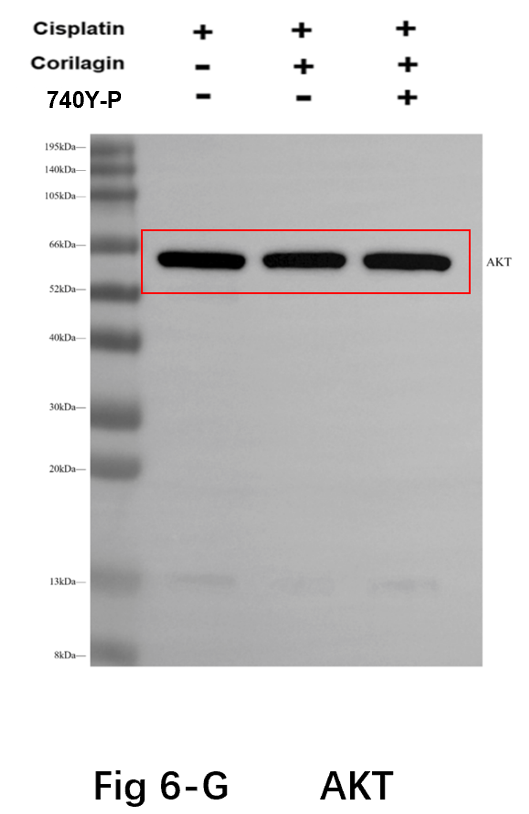





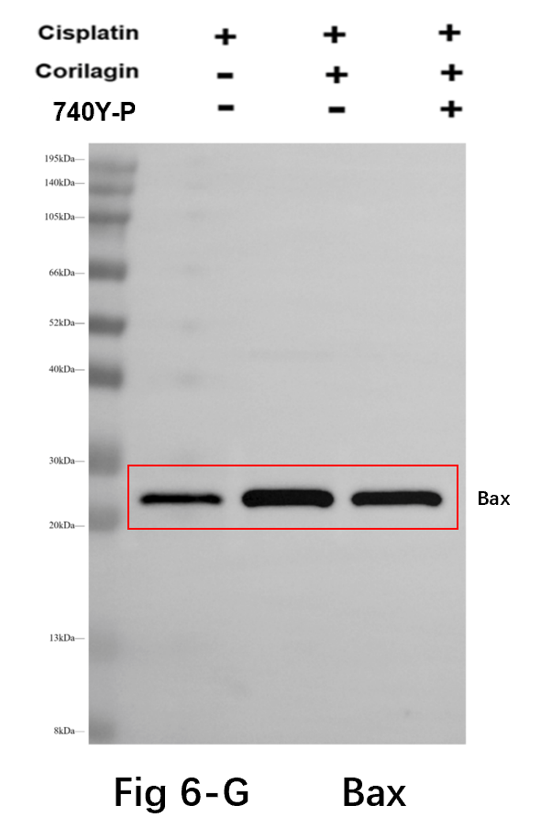





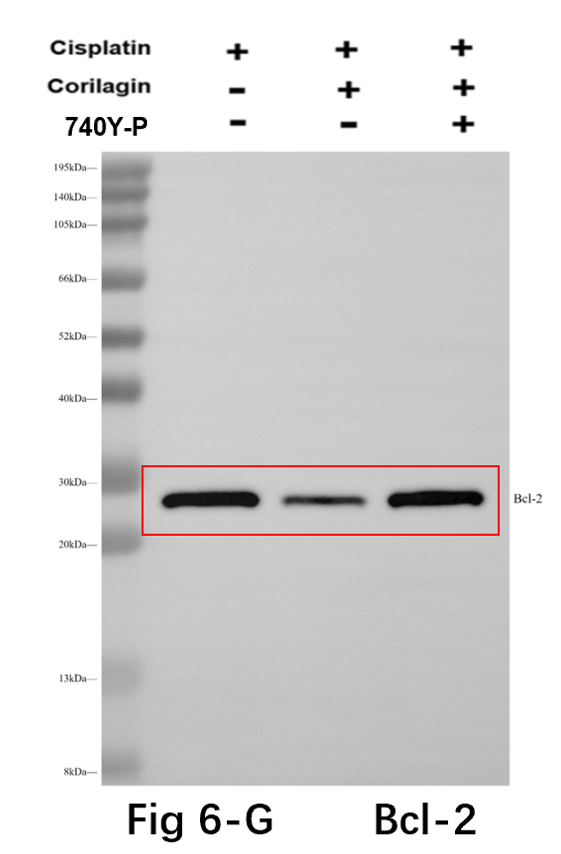





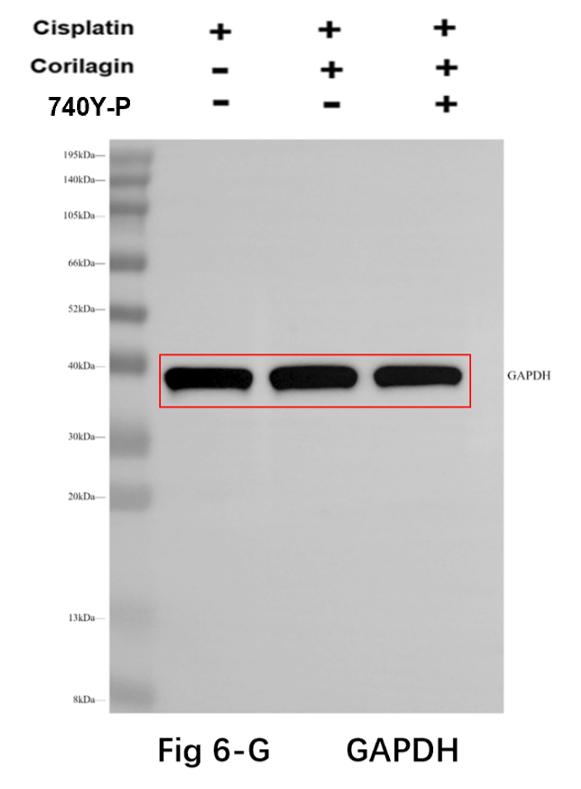





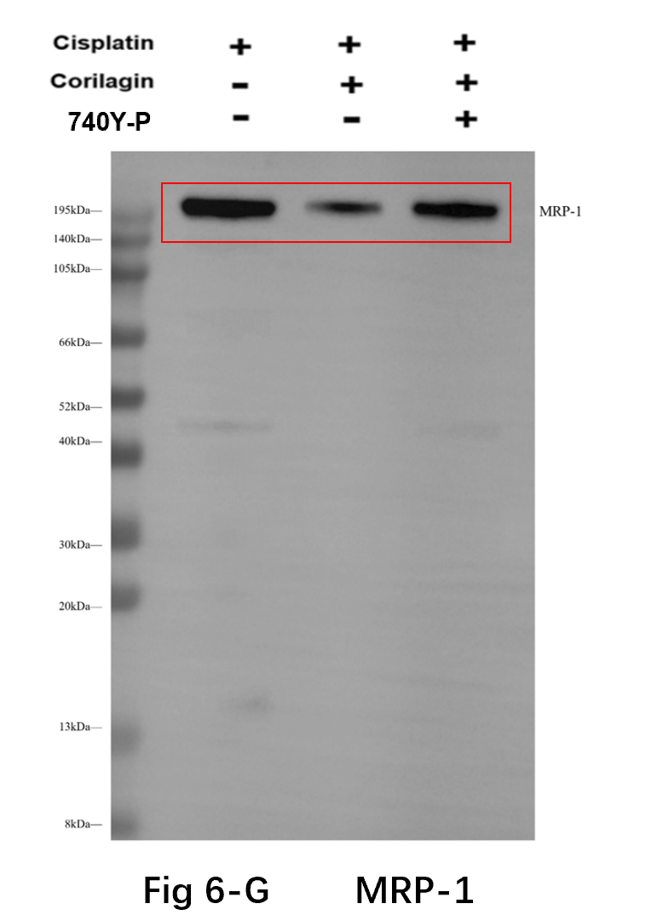




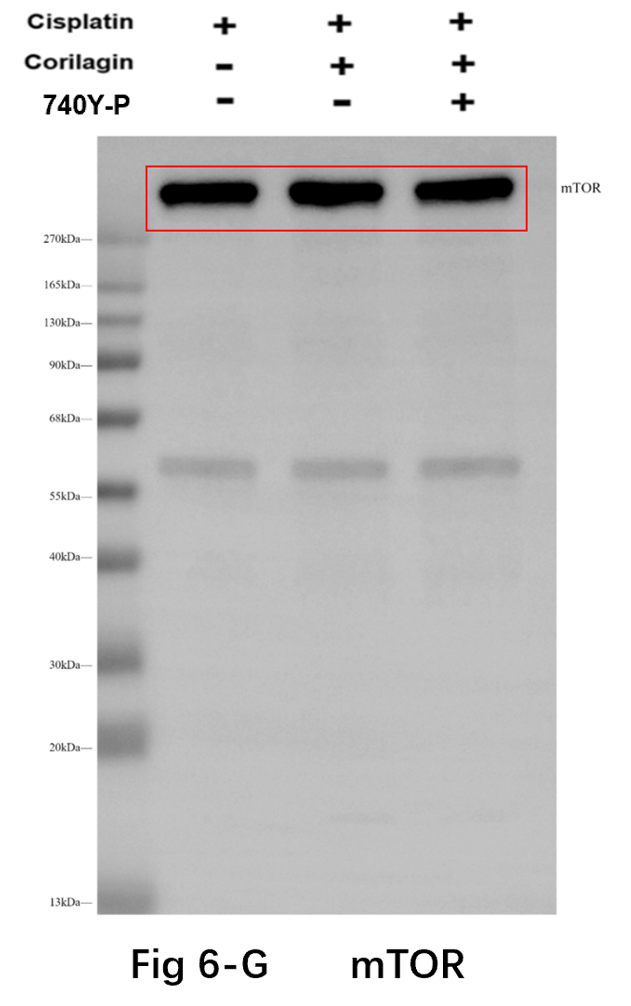





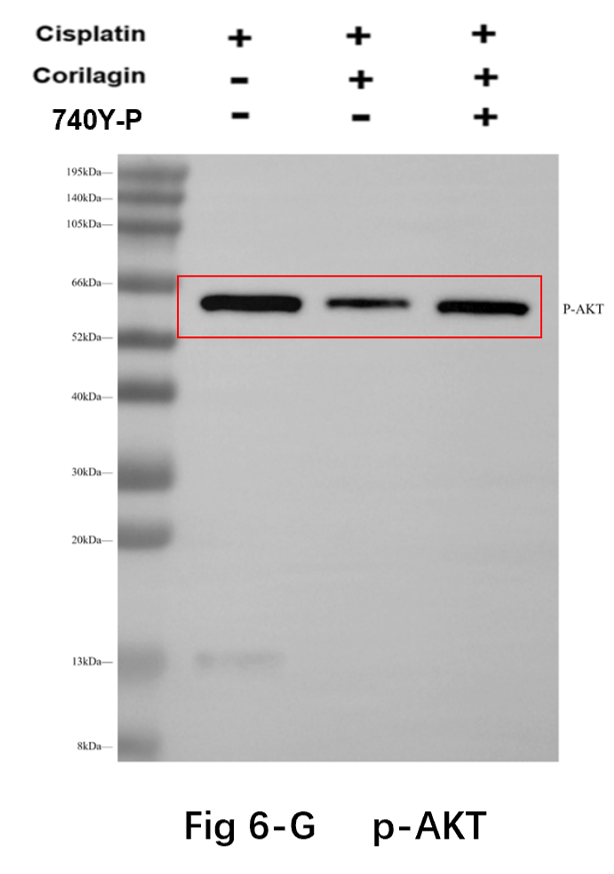





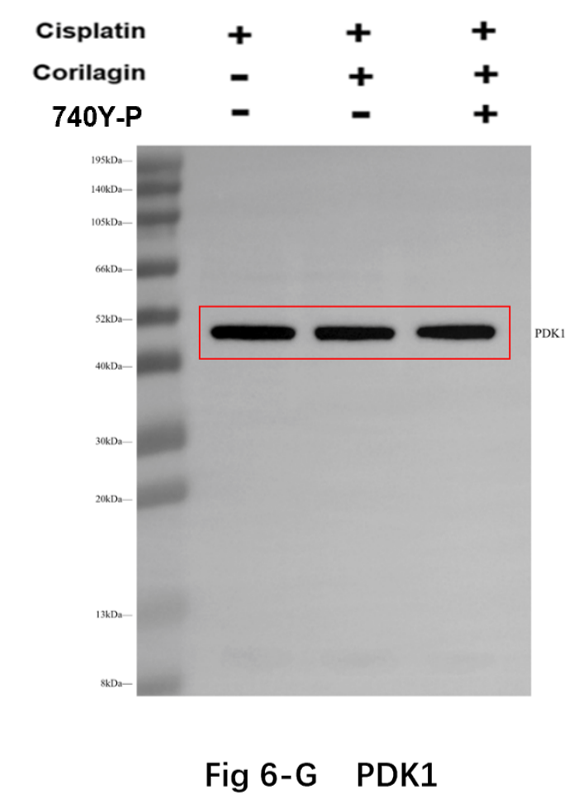





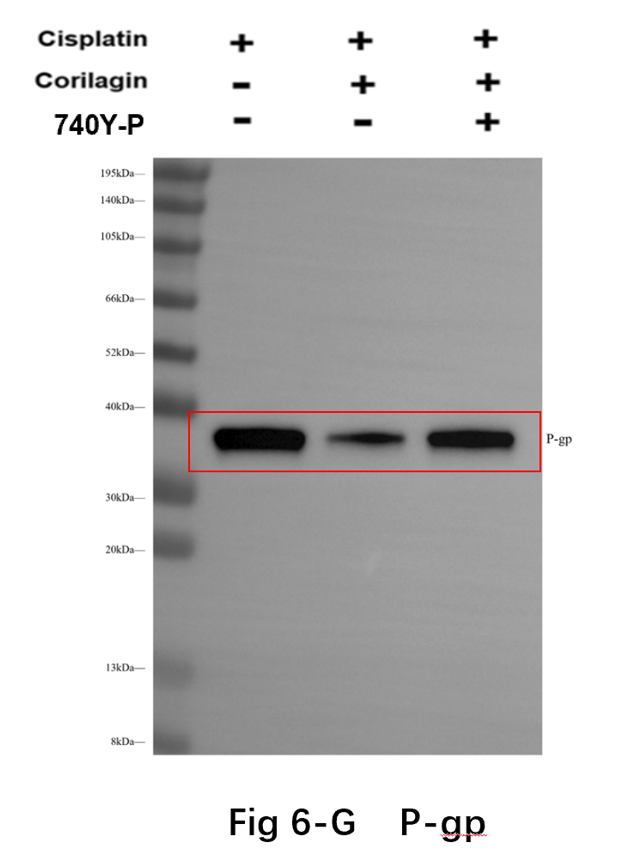




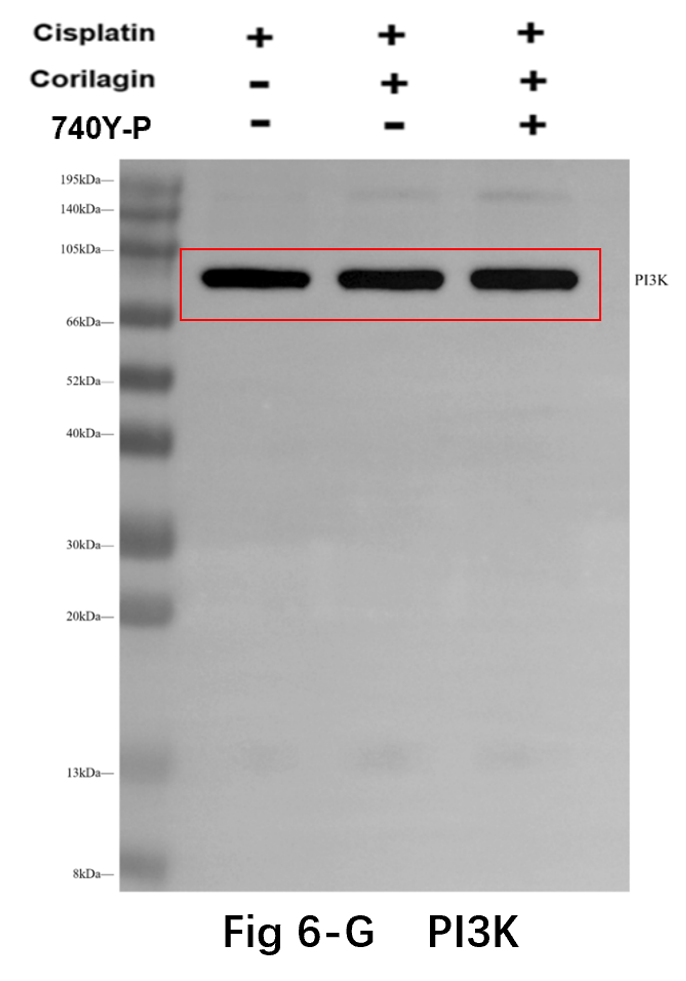




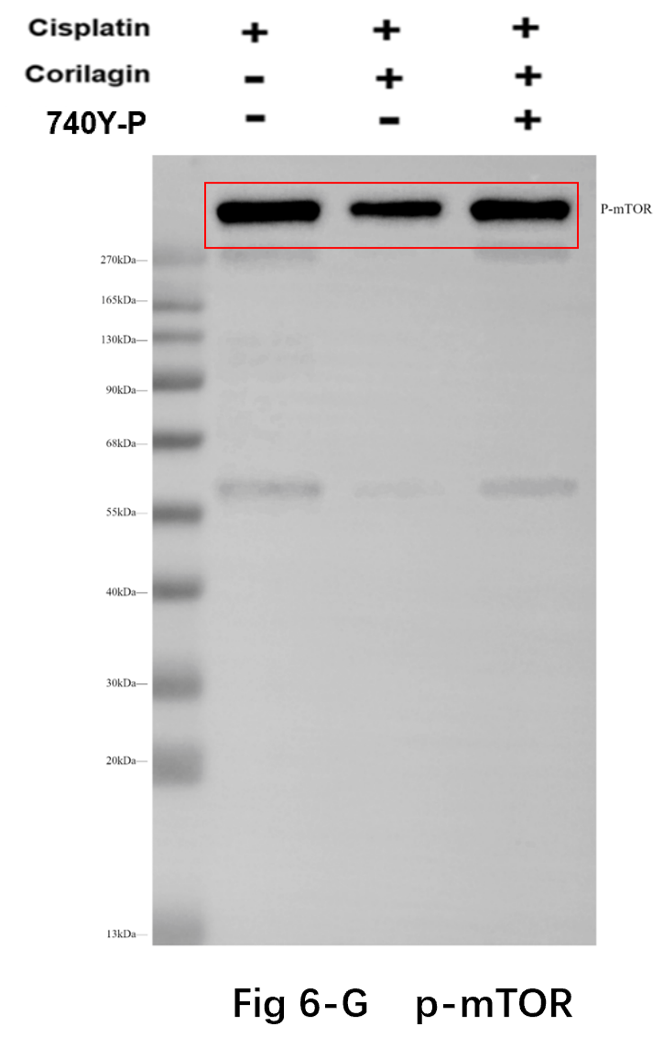




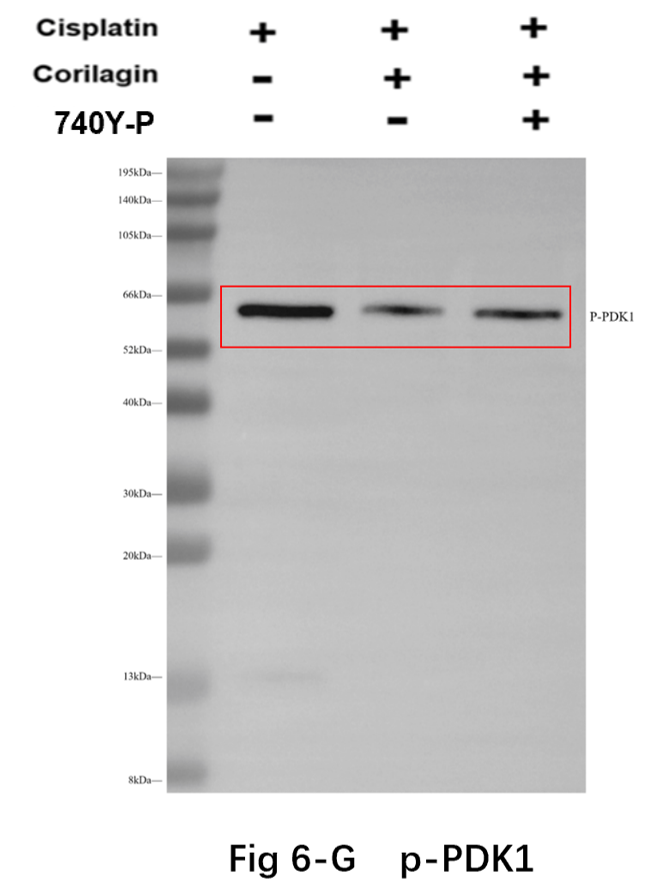




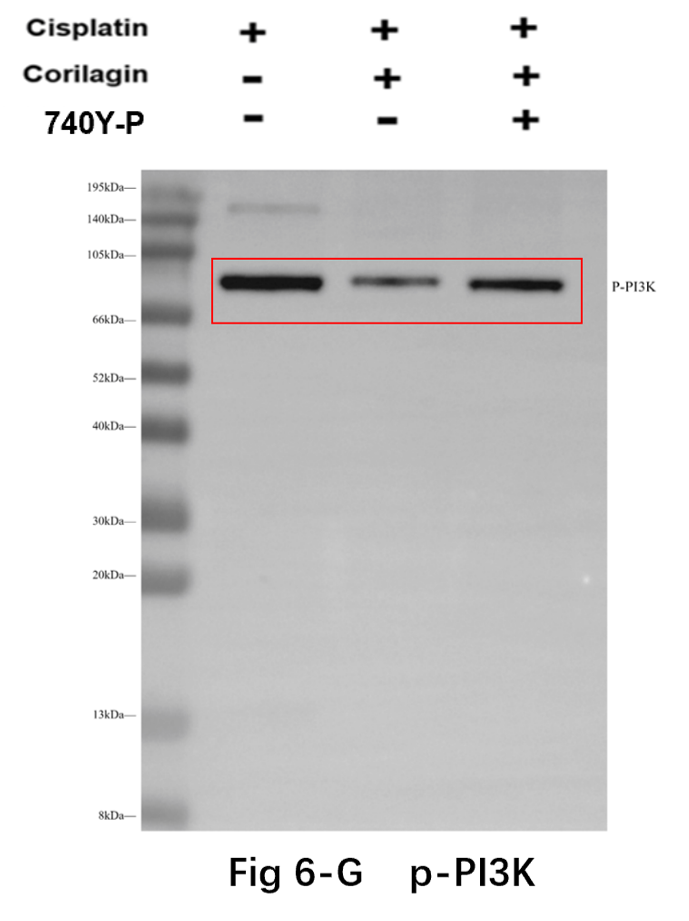

Supplement: Supplementary file 1 [file 7f1b9b3aac7fb3cf06fc8f96.docx]
